# Supplementary material for: The Effects of Commonly Consumed Dietary Fibres on the Gut Microbiome and Its Fibre Fermentative Capacity in Adults with Inflammatory Bowel Disease in Remission
Source: MDPI journal article supplement (doi:10.3390/nu14051053), 2022-03-02

Healthy Controls: Non-Substrate Control

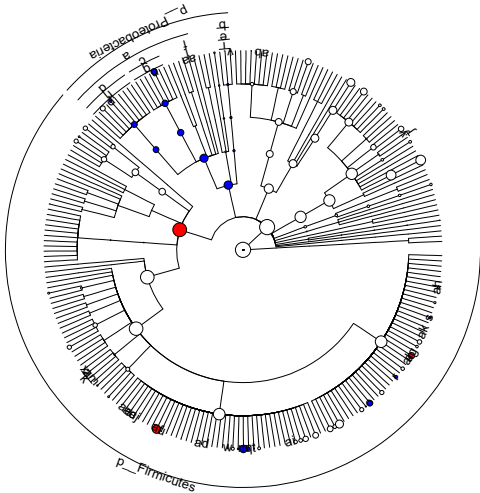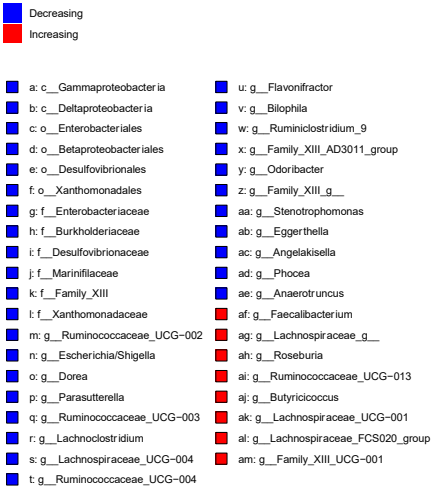

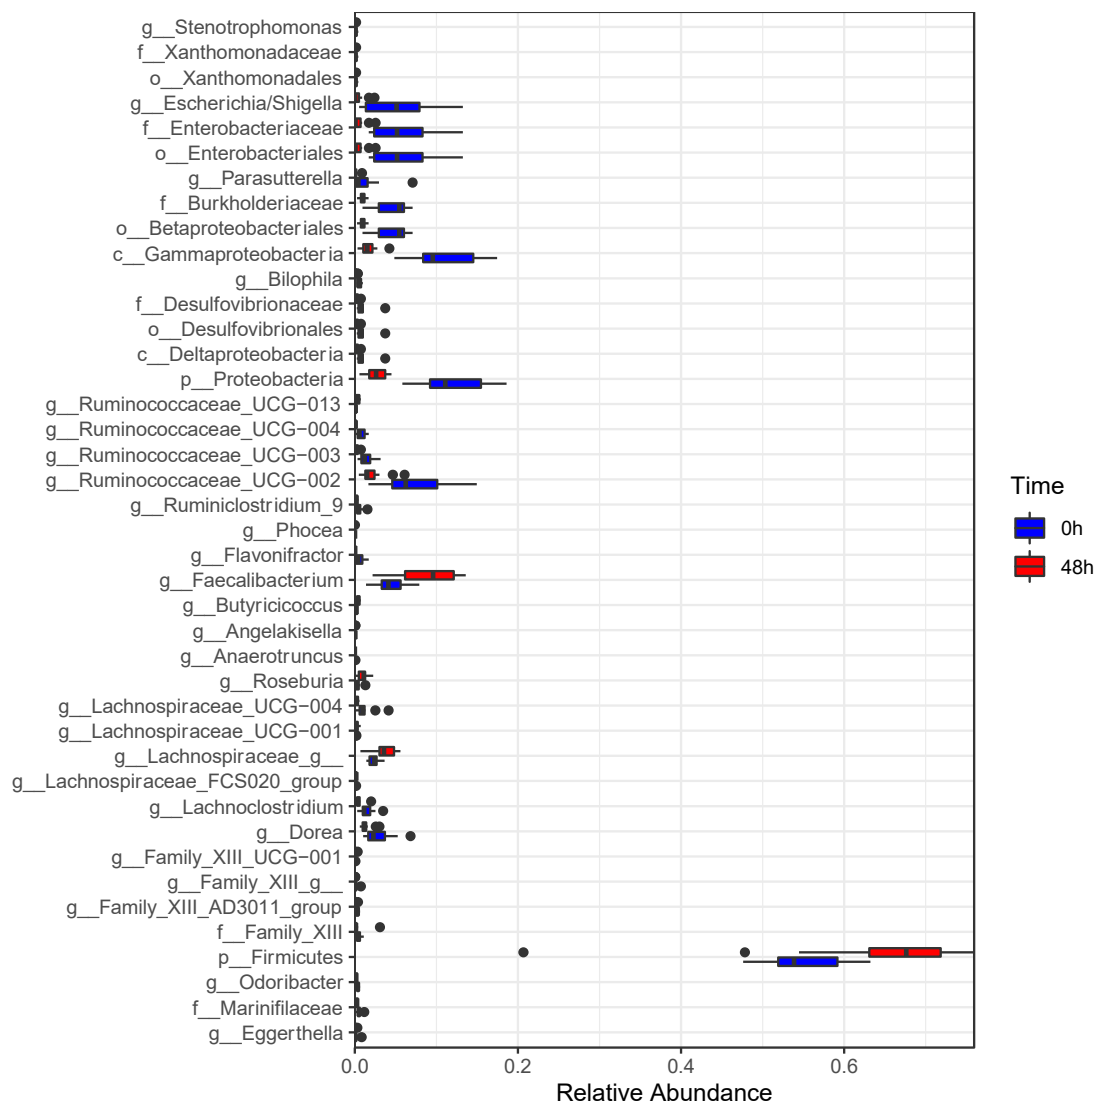

Healthy Controls: Hi Maize

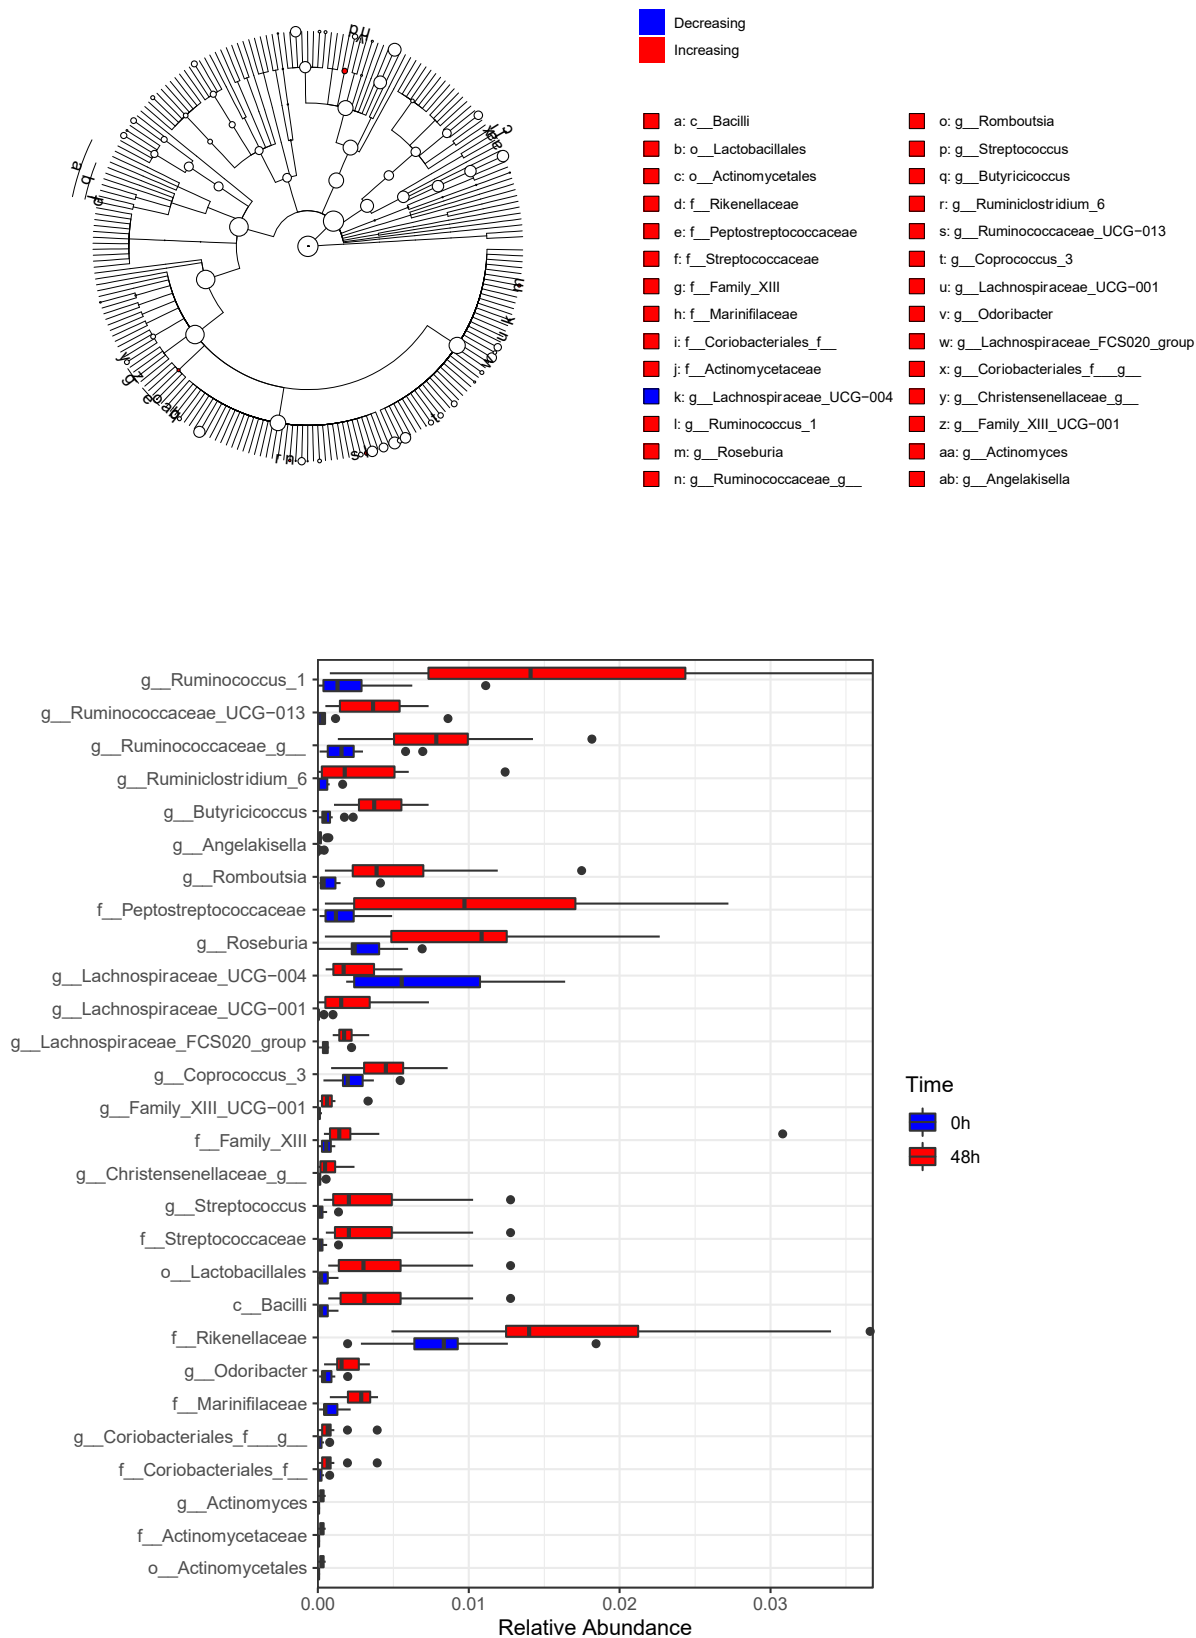

Healthy Controls: Apple Pectin

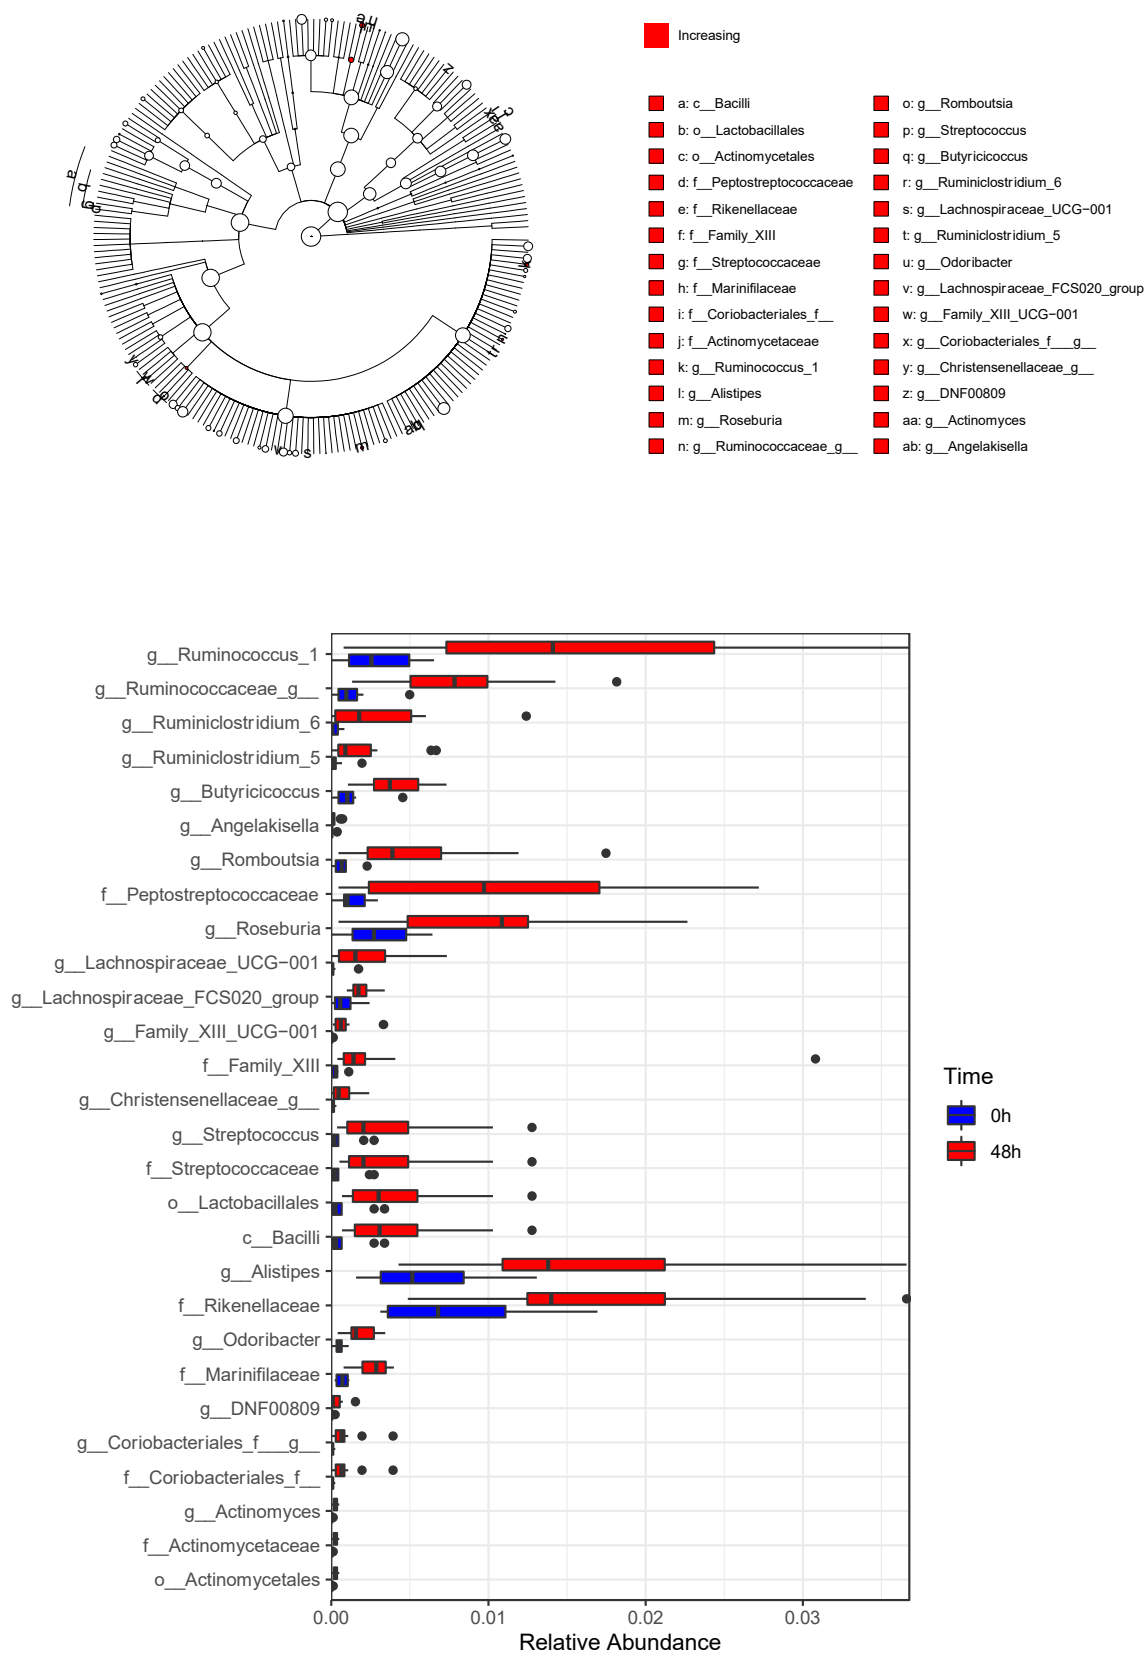

Healthy Controls: Raftilose

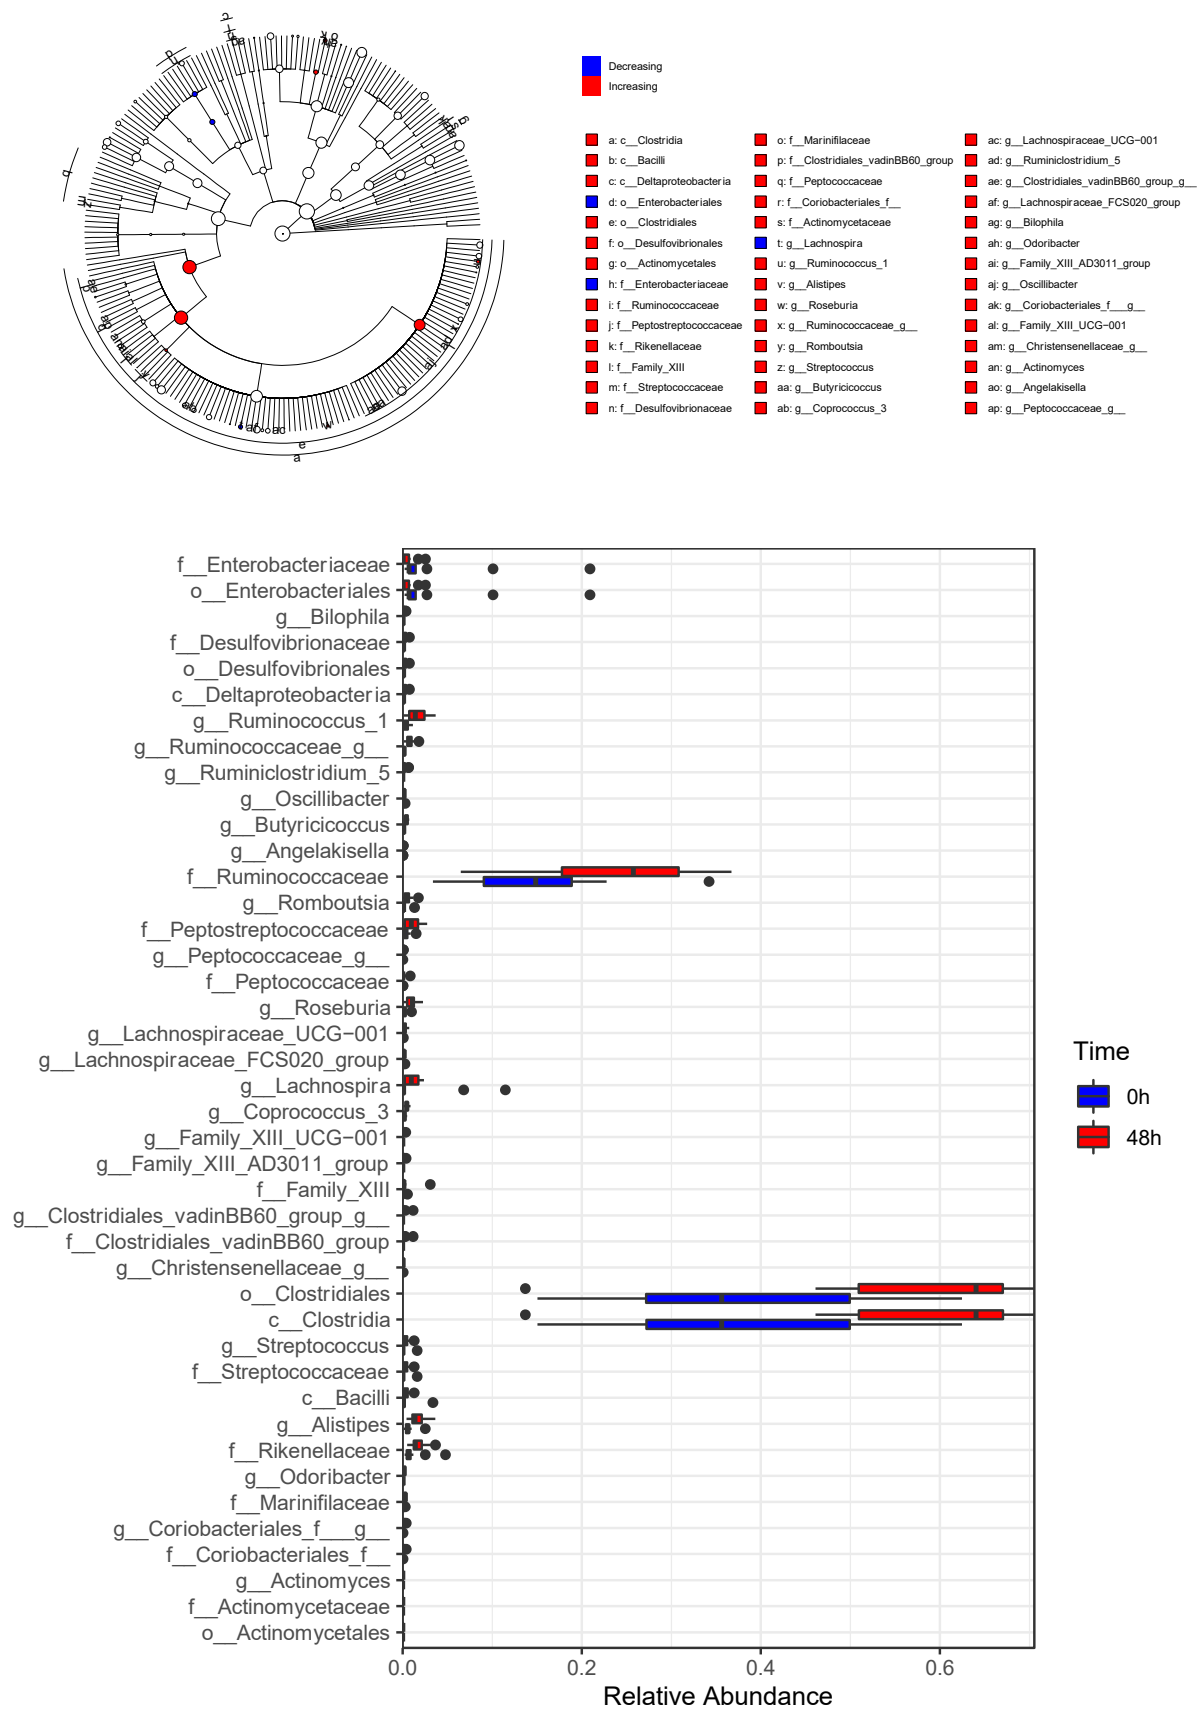

Healthy Controls: Wheat Bran

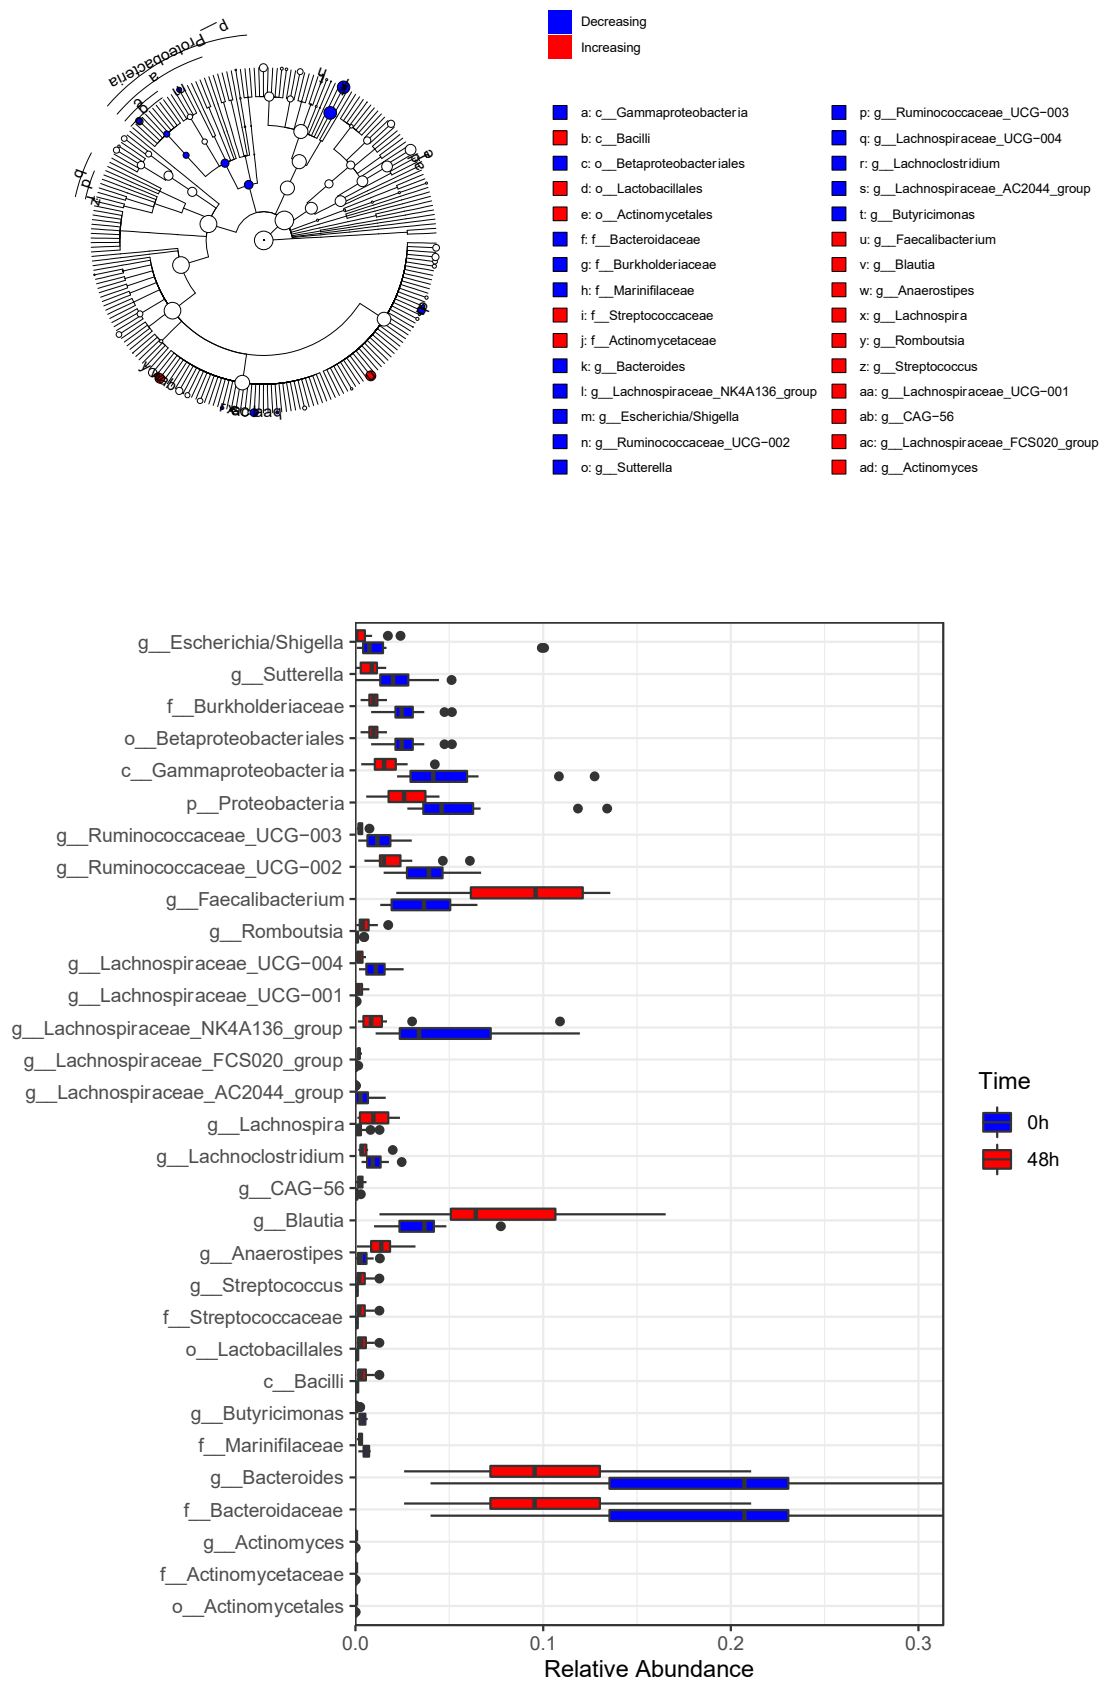

Healthy Controls: Mixed Fibre

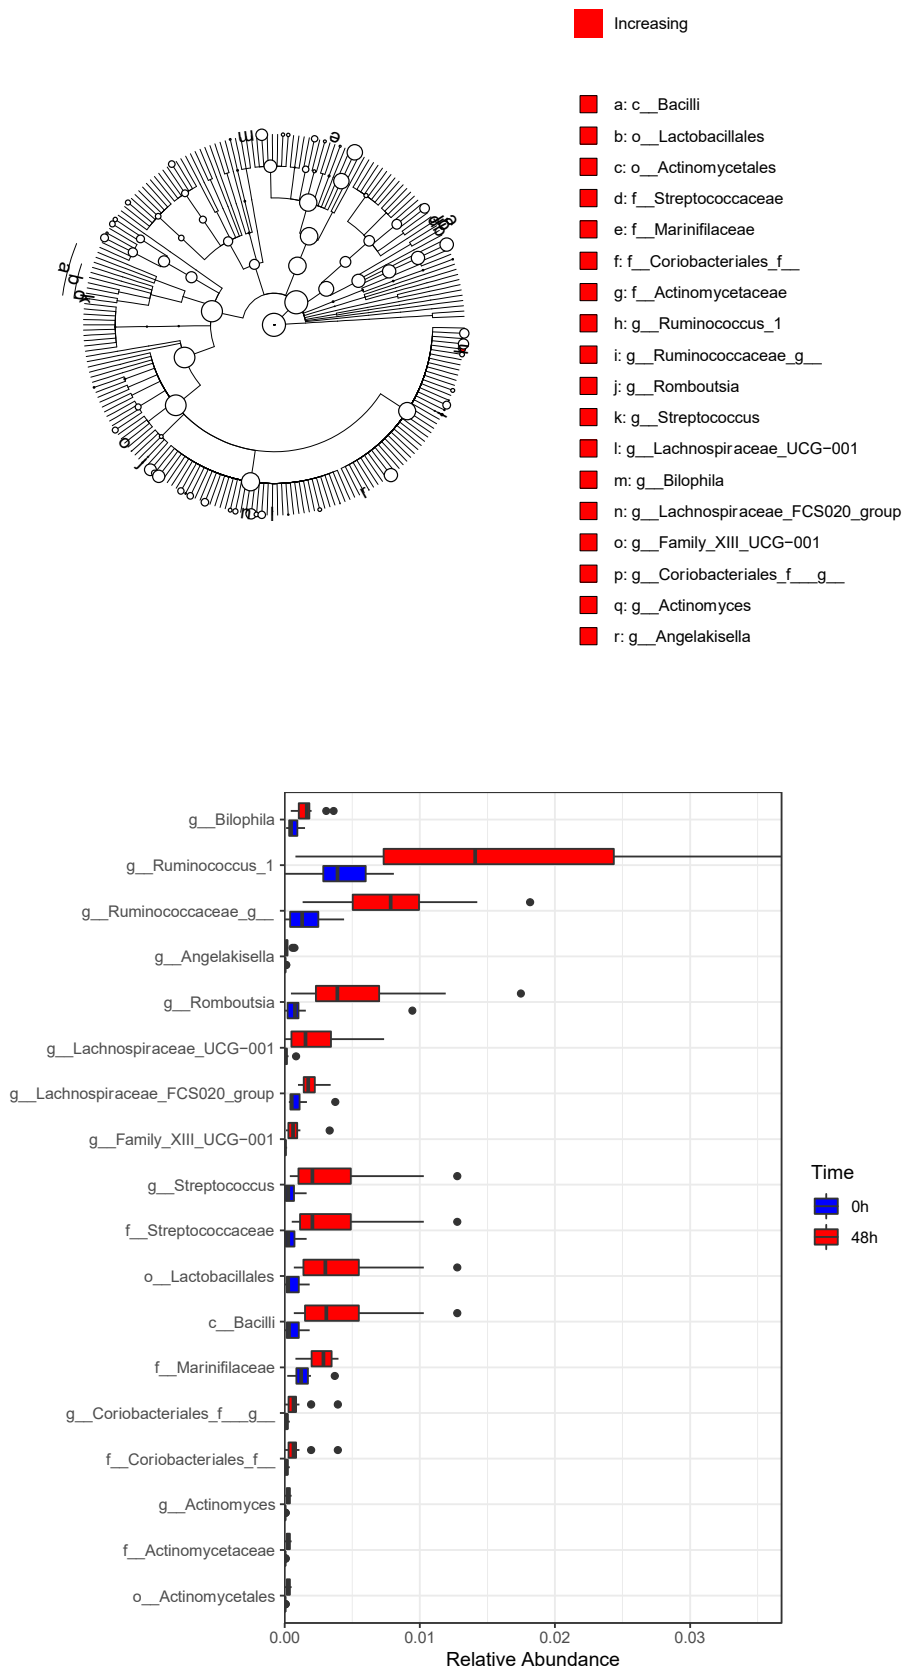

Ulcerative Colitis: Non-substrate control

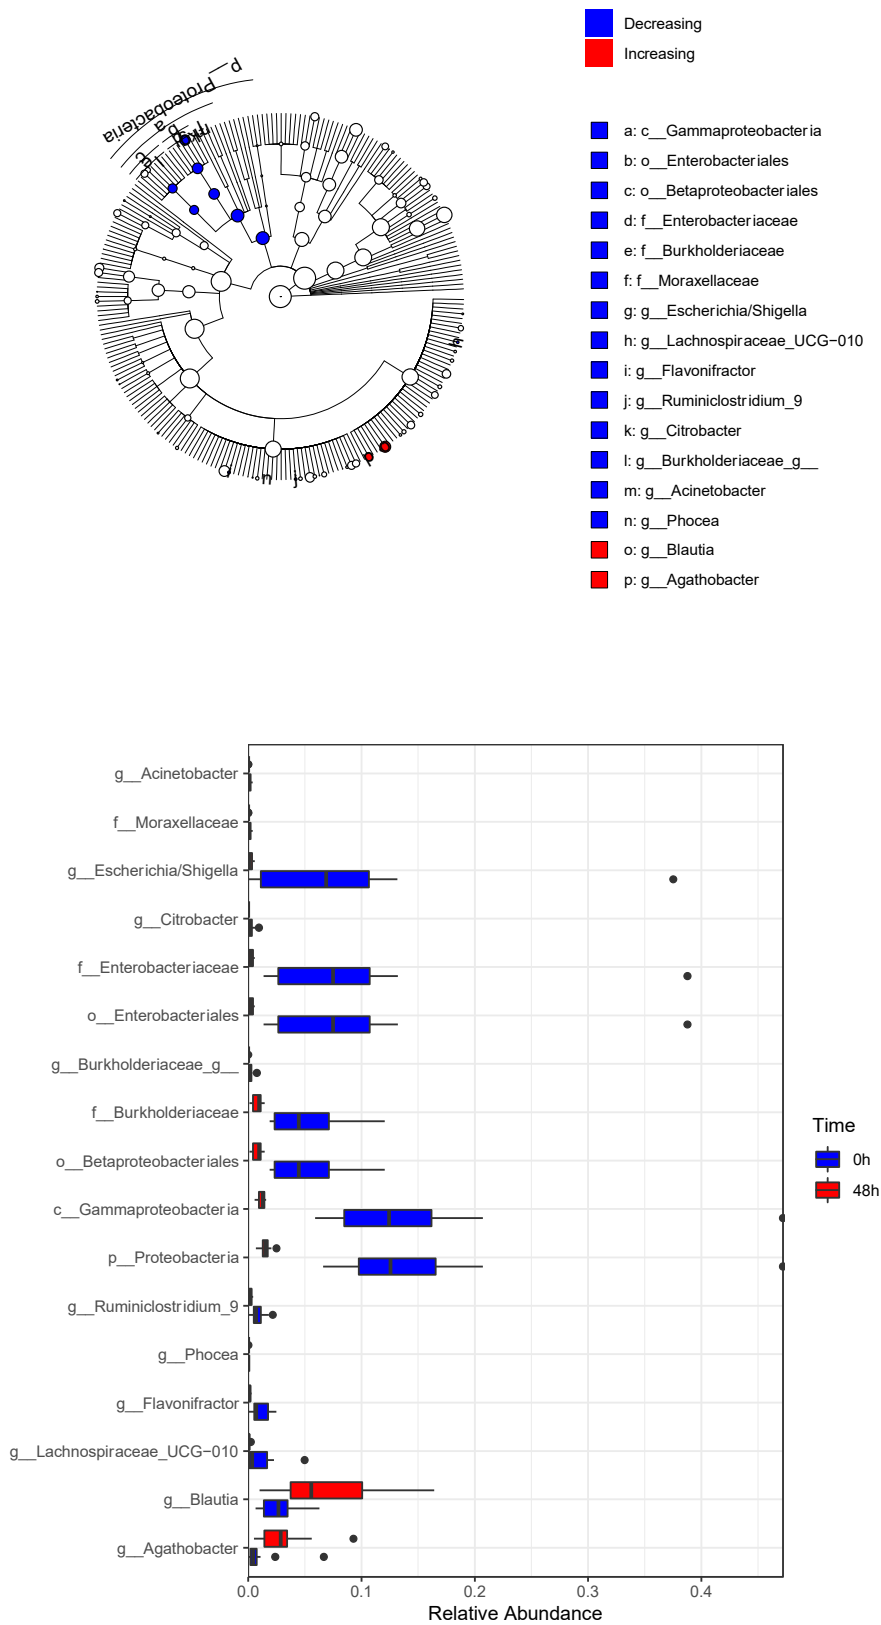



Ulcerative Colitis: Raftilose

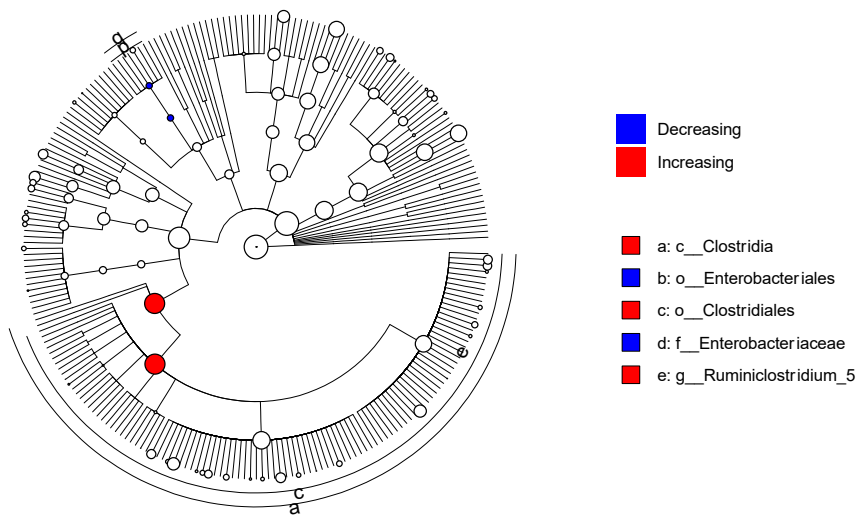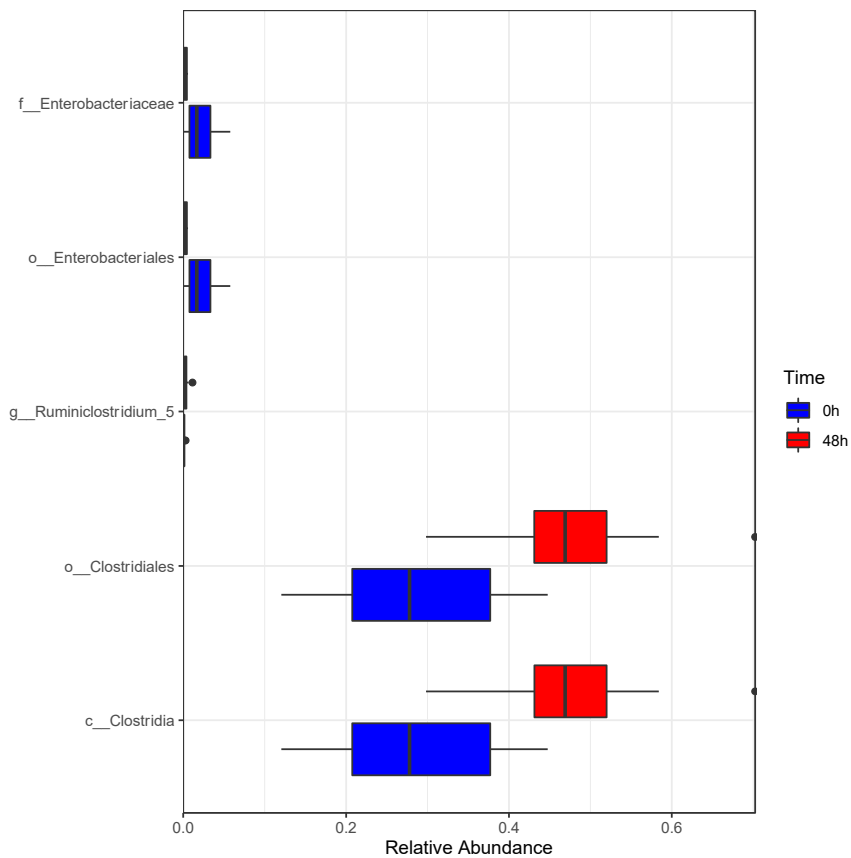

Ulcerative Colitis: Wheat Bran

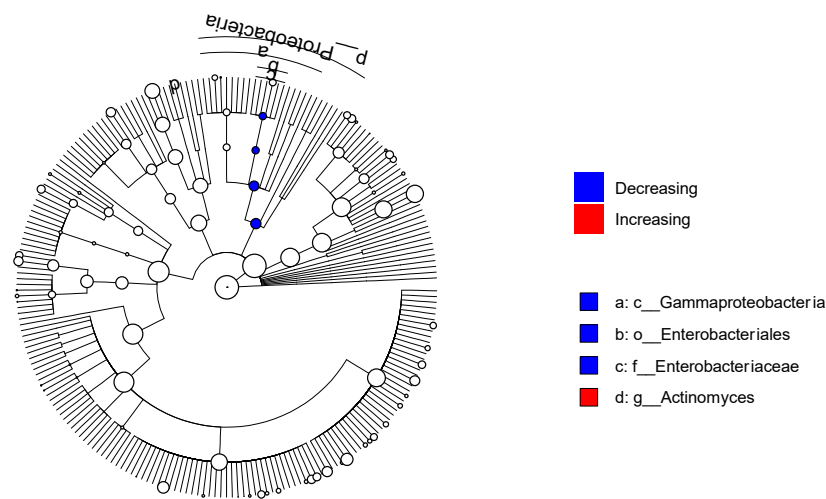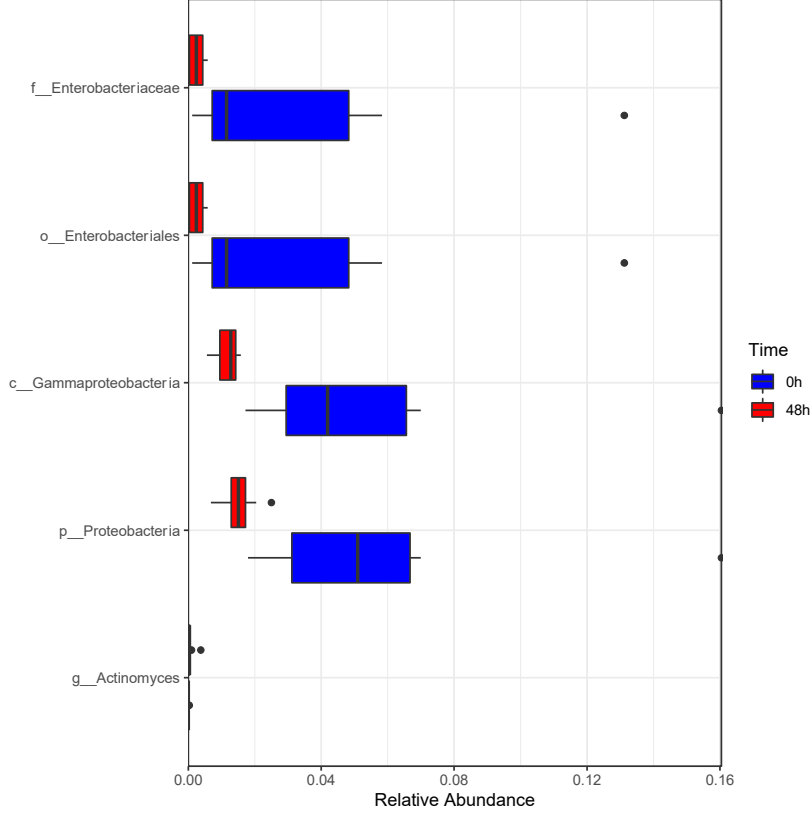

Crohn’s Disease: Mixed Fibre

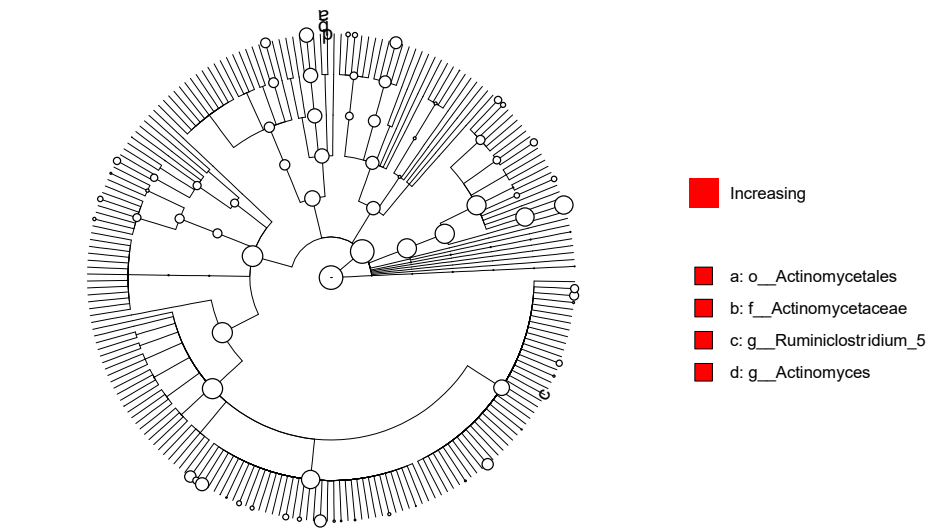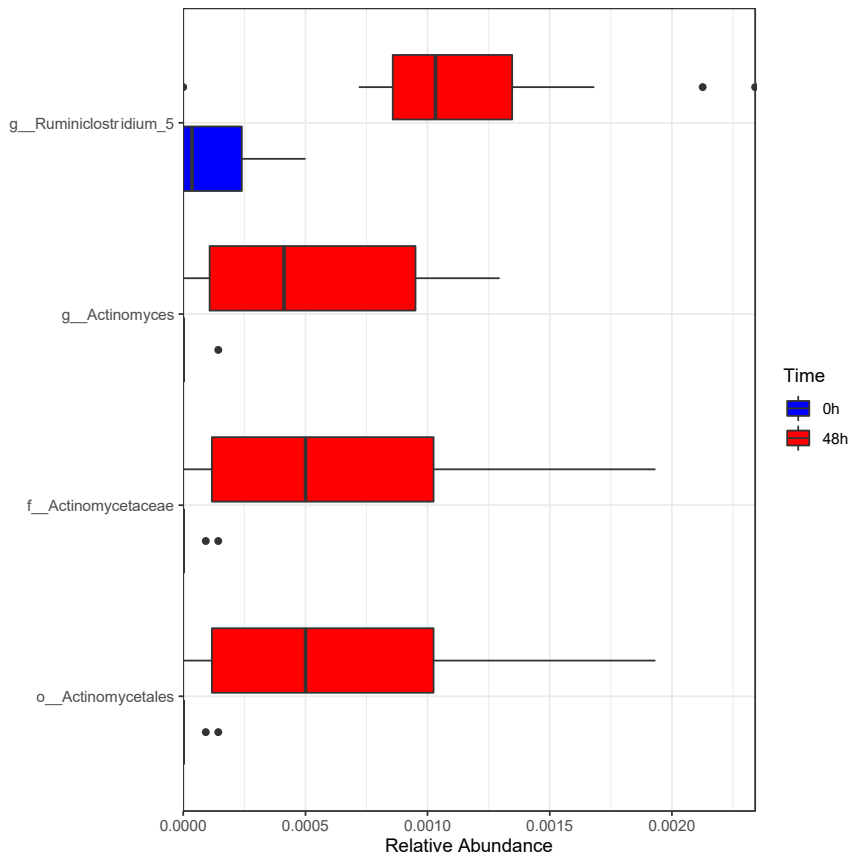

Supplement: s1 [file s1]
