# Supplementary material for: The Effects of Commonly Consumed Dietary Fibres on the Gut Microbiome and Its Fibre Fermentative Capacity in Adults with Inflammatory Bowel Disease in Remission
Source: MDPI journal article supplement (doi:10.3390/nu14051053), 2022-03-02
Supplement: s1 [file s1]

**Table S1:** Concentration of faecal short and branched chain fatty acids in adults with Crohn's disease and ulcerative colitis in remission and compared with healthy controls

|                       | <b>Healthy Controls</b> | <b>Crohn's Disease</b> | <b>Ulcerative Colitis</b> |
|-----------------------|-------------------------|------------------------|---------------------------|
| N                     | 8                       | 8                      | 8                         |
| Faecal water (%)      | 64 (61 : 70)            | 71 (65 : 79)           | 73 (68 : 78)              |
| Acetate               | 83 (67 : 101)           | 82 (59 : 112)          | 73 (63 : 114)             |
| Propionate            | 16.3 (14.2 : 23.3)      | 16.8 (13.1 : 22)       | 12.8 (10.8 : 24.9)        |
| Butyrate              | 15.5 (12.8 : 16.8)      | 10.3 (7.6 : 24.7)      | 15.2 (7.5 : 23)           |
| Valerate              | 1.9 (1.7 : 3.0)         | 2.3 (1.5 : 2.7)        | 1.8 (1.4 : 2.8)           |
| Hexanoate             | 0.8 (0.3 : 1.4)         | 1.0 (0.6 : 1.3)        | 0.2 (0.1 : 0.4)*          |
| Heptanoate            | 0.11 (0.04 : 0.23)      | 0.16 (0.07 : 0.22)     | 0.05 (0.02 : 0.07)        |
| Octanoate             | 0.11 (0.04 : 0.51)      | 0.06 (0.04 : 0.1)      | 0.18 (0.04 : 0.4)         |
| <i>iso</i> -butyrate  | 1.6 (1.5 : 2.8)         | 1.8 (1.5 : 2.4)        | 1.7 (1.2 : 2.1)           |
| <i>iso</i> -valerate  | 2.2 (1.8 : 4.3)         | 2.6 (1.9 : 3.1)        | 2.2 (2.0 : 2.6)           |
| <i>iso</i> -hexanoate | 0.07 (0.06 : 0.09)      | 0.07 (0.06 : 0.09)     | 0.08 (0.04 : 0.11)        |
| Total SCFA            | 126 (102 : 147)         | 106 (89 : 167)         | 117 (93 : 158)            |

Data (μmol/g of faeces) are presented with median and inter-quartile ranges
