# Supplementary figures and images for: The Effects of Commonly Consumed Dietary Fibres on the Gut Microbiome and Its Fibre Fermentative Capacity in Adults with Inflammatory Bowel Disease in Remission
Source: MDPI journal article supplement (doi:10.3390/nu14051053), 2022-03-02

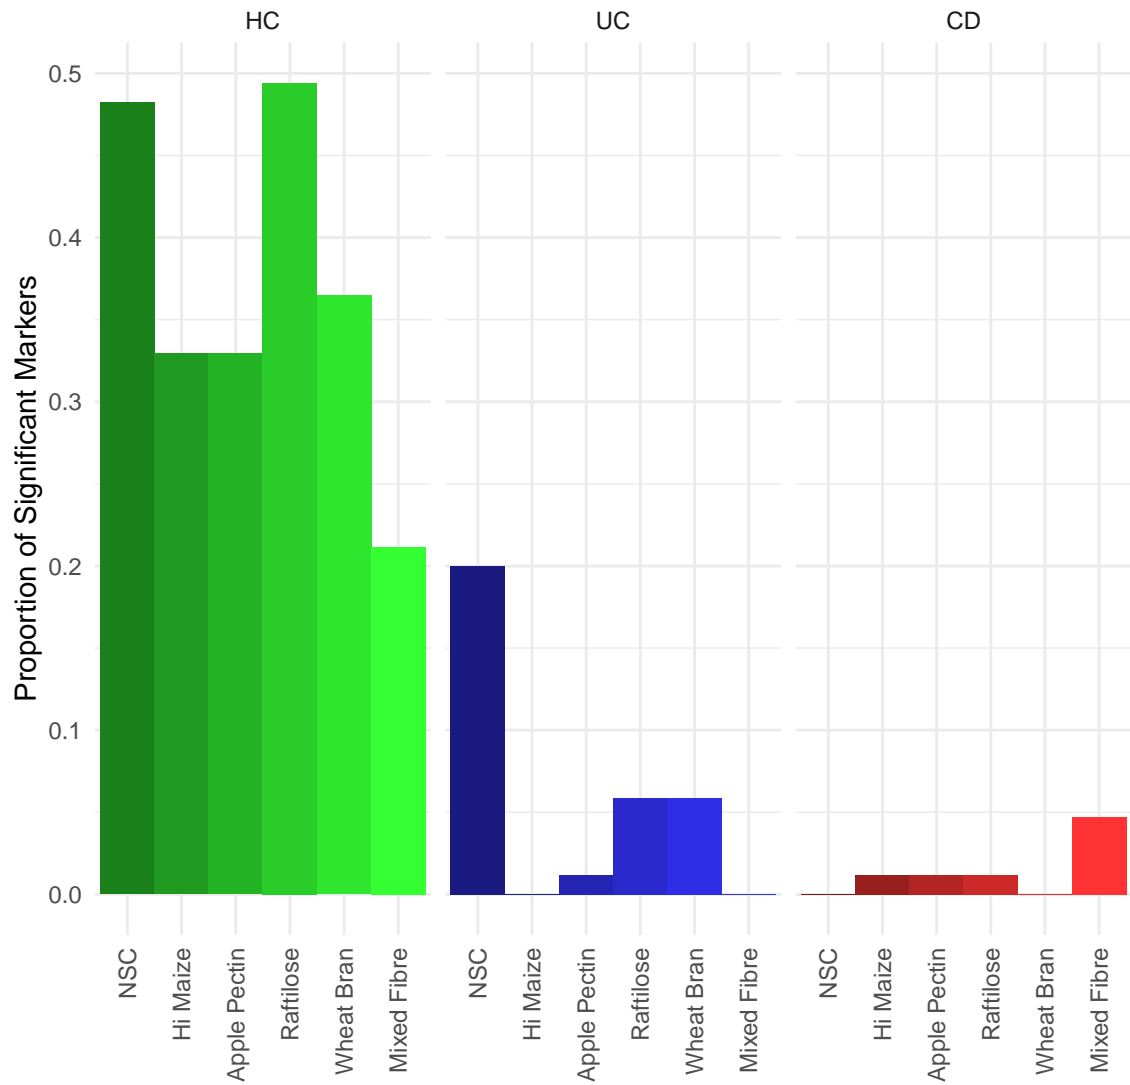

Supplement: s1 [file s1]

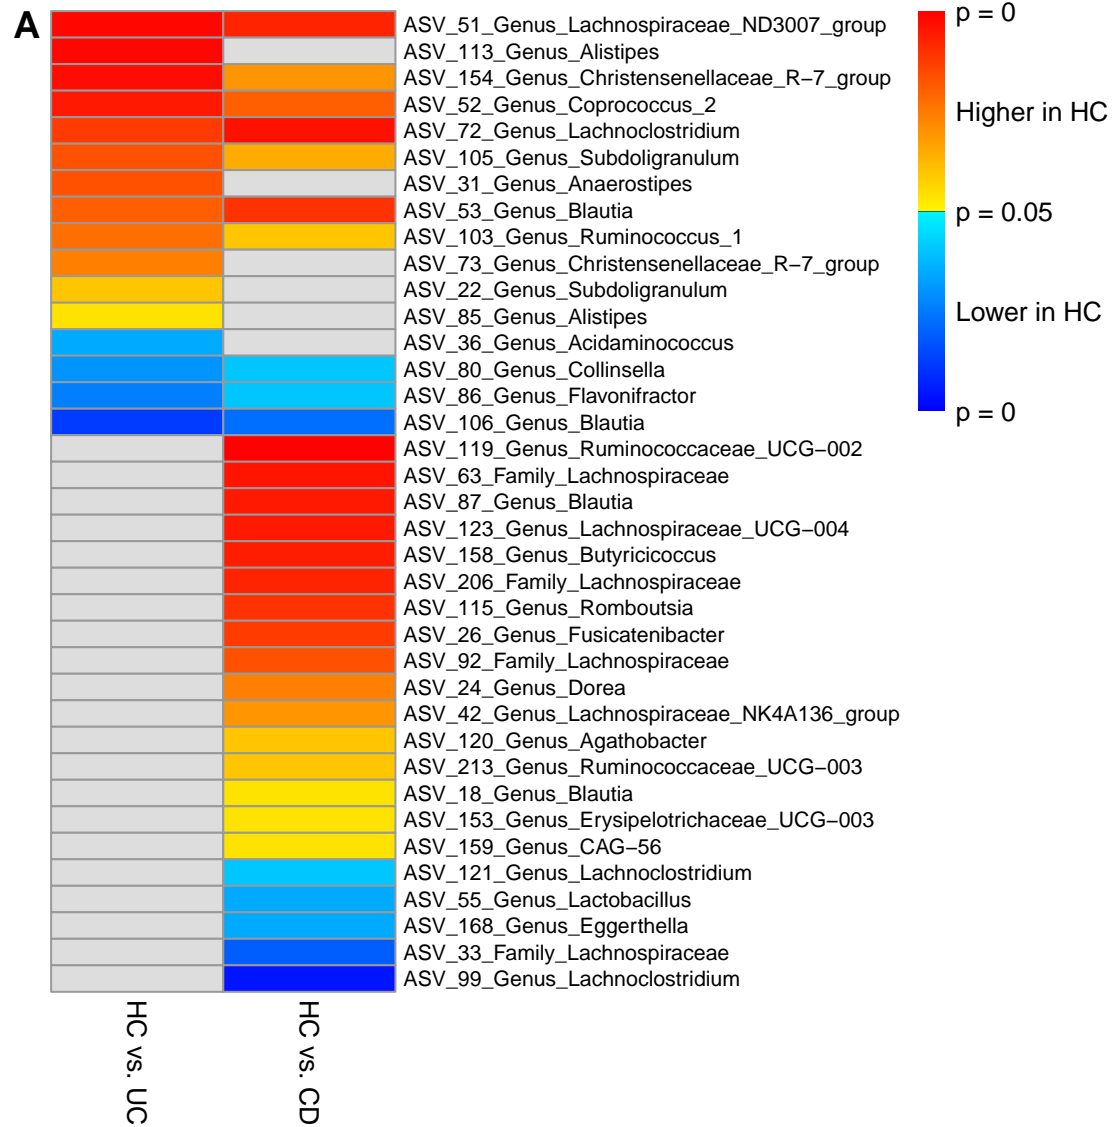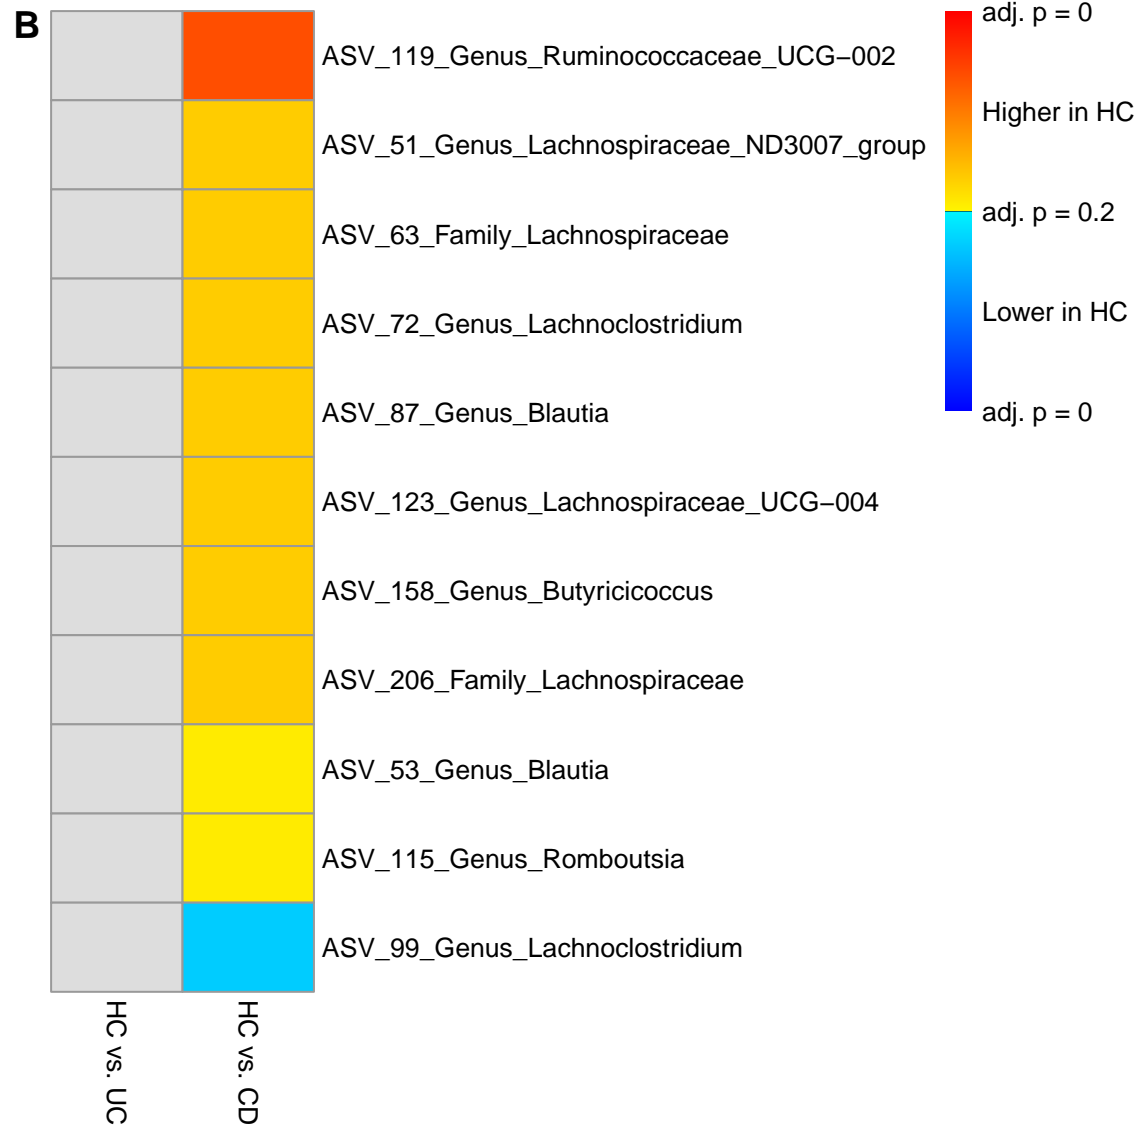

Supplement: s1 [file s1]
